# Supplementary material for: Endothelial Cell Inflammation and Barriers Are Regulated by the Rab26-Mediated Balance between β2-AR and TLR4 in Pulmonary Microvessel Endothelial Cells
Source: Hindawi journal article supplement (doi:10.1155/2019/7538071), 2019-04-28
Supplement: f1 [file 7538071.f1.pdf]

# **Endothelial cell inflammation and barriers are regulated by the Rab26-mediated balance between $\beta_2$ -AR and TLR4 in pulmonary microvessel endothelial cells**

Huaping Chen<sup>1,#</sup>, Ming Yuan<sup>1,#</sup>, Chunji Huang<sup>2</sup>, Zhi Xu<sup>1</sup>, Mingchun Li<sup>1</sup>, Chun Zhang<sup>1</sup>, Zhan Gao<sup>1</sup>,  
Mingzhou Zhang<sup>1</sup>, Jiancheng Xu<sup>1</sup>, Hang Qian<sup>1</sup>, Jiegen You<sup>3,\*</sup>, Binfeng He<sup>1</sup>, Guansong Wang<sup>1</sup>,  
Mingdong Hu<sup>1,\*</sup>

<sup>1</sup> Institute of Respiratory Diseases, Xinqiao Hospital, Third Military Medical University, Chongqing 400037,  
China

<sup>2</sup> Basic Medical College, Third Military Medical University, Chongqing 400038, China

<sup>3</sup> Jiangxi Academy of Medical Sciences, Nanchang City, Jiangxi Province 330006, China

# Contributed equally to this work

Correspondence should be addressed: \* Mingdong Hu, [huhanshandd@aliyun.com](mailto:huhanshandd@aliyun.com); and \*Jiegen You, [yjg700330@163.com](mailto:yjg700330@163.com)



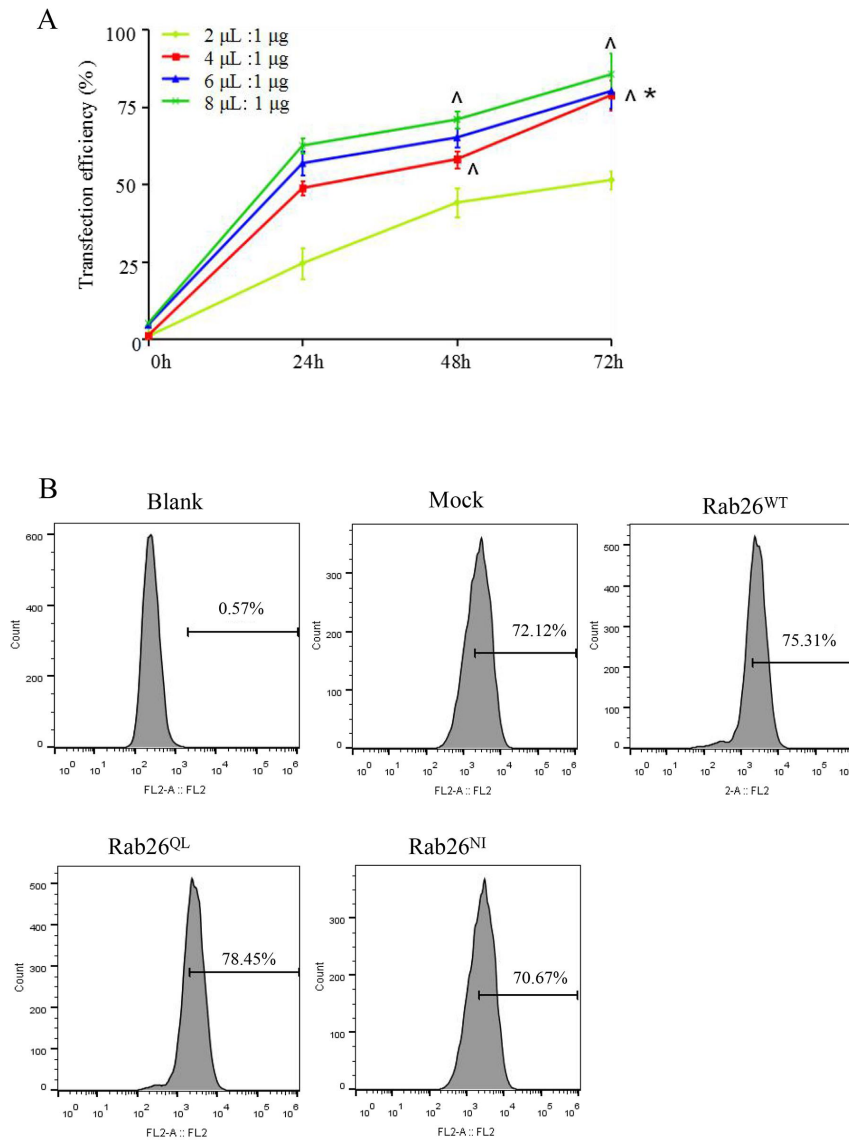

**Fig.S2.** FACS analysis the transfection efficiency of DsRed-tagged Rab26 plasmid. (A). Time- and- dose dependent cell transfection efficiency of the DsRed-tagged Rab26<sup>WT</sup> plasmid in HPMECs. HPMECs were incubated with transfection reagent (2μL, 4 μL, 6μL, 8μL) and DsRed-tagged Rab26<sup>WT</sup> plasmid (1 μg) at various periods of time (0 h, 24 h, 48 h, or 72 h). (B). Transfection efficiency of the DsRed-tagged Rab26 plasmid by FACS. HPMECs were transfected with ViaFect<sup>TM</sup> transfection reagent (4 μL) and plasmid (1 μg) for 72 h. Blank, DsRed vector (Mock), DsRed-tagged Rab26 wild-type (Rab26<sup>WT</sup>), DsRed-tagged Rab26Q123L (Rab26<sup>QL</sup>), DsRed-tagged Rab26N177I (Rab26<sup>NI</sup>). The data are the means  $\pm$  SD (n = 3). ^, p < 0.05 versus the groups incubated for 24 h; \*, p < 0.05 versus the 48 h group.

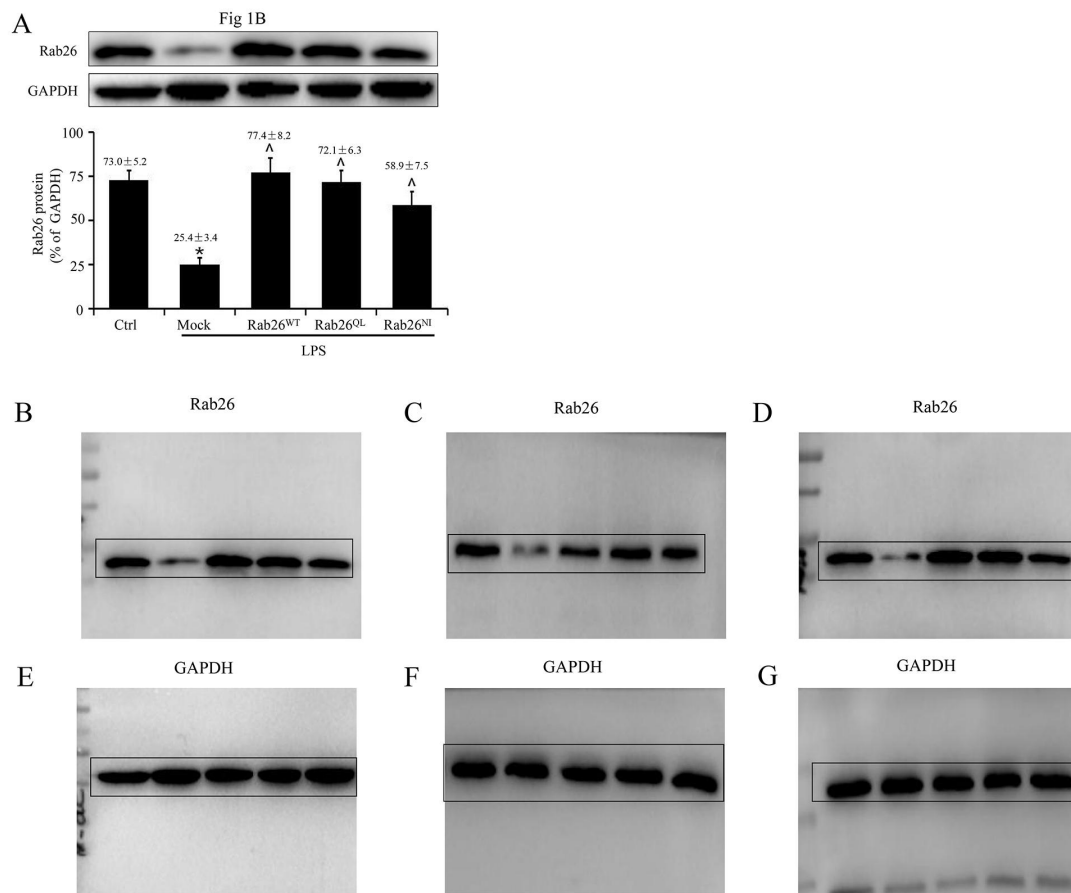

**Fig.S3.** Original full-size western blots used for Figure 1B. (A) Fig. 1B. (B-D) The WB full membranes of Rab26. The molecular mass (MW) is 28 kDa. (E-G) The WB full membranes of GAPDH. The molecular mass (MW) is 37 kDa. The data are the means ± SD (n = 3). \*, p < 0.05 versus the control group; ^, p < 0.05 versus the mock group.

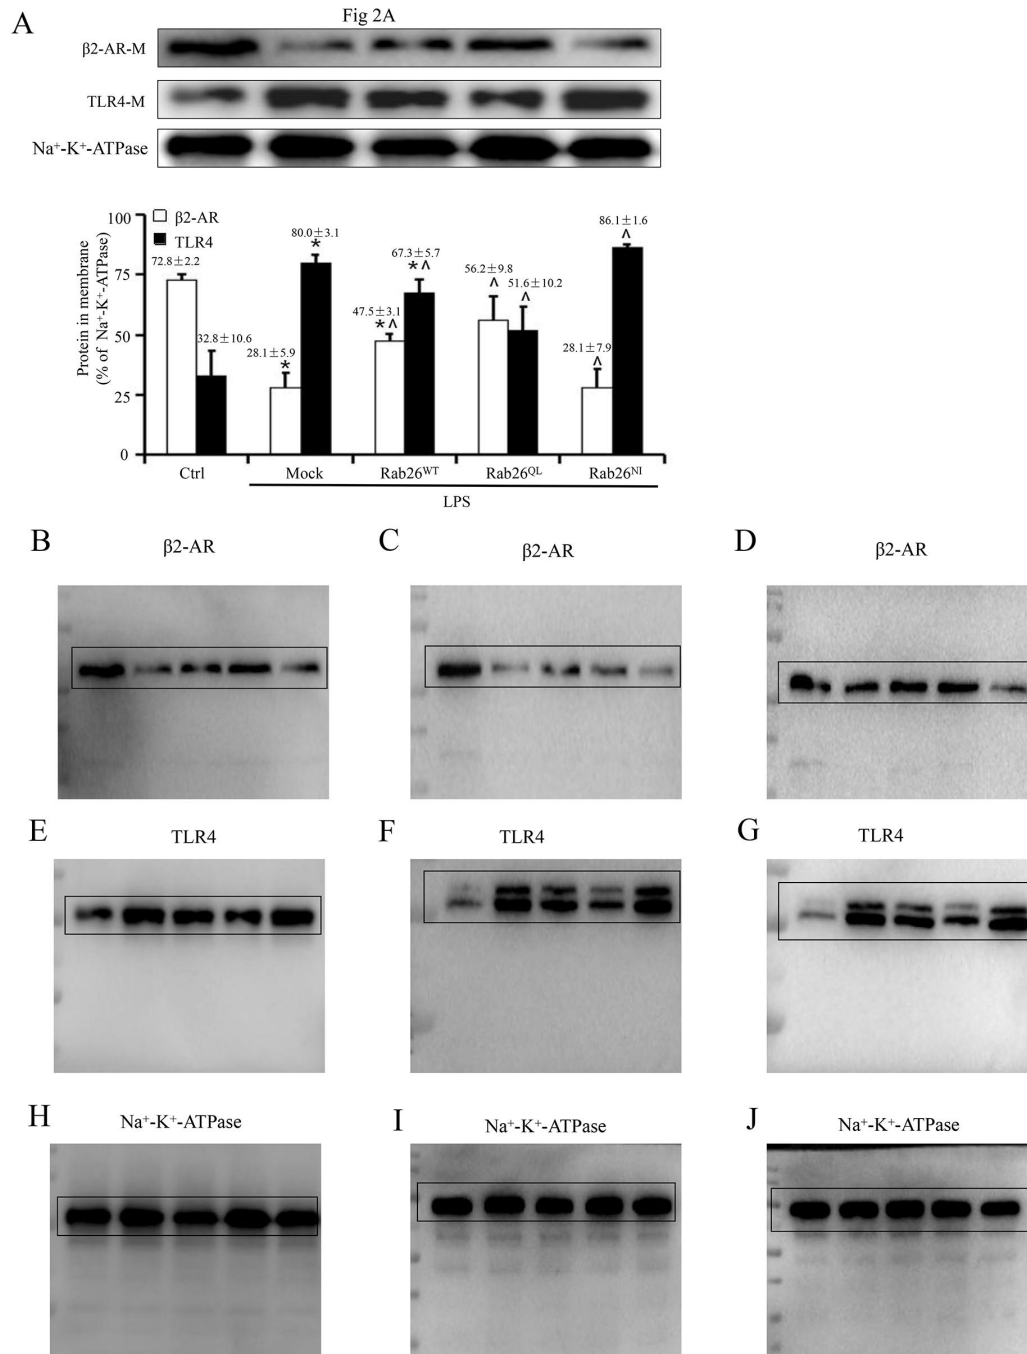

**Fig.S4.** Original full-size western blots used for Figure 2A. (A) Fig. 2A. (B-D) The full WB membranes of β<sub>2</sub>-AR. The molecular mass (MW) is 45 kDa. (E-G) The full WB membranes of TLR4. The molecular mass (MW) is 97 kDa. (H-J) The full WB membranes of Na<sup>+</sup>-K<sup>+</sup>-ATPase. The molecular mass (MW) is 117 kDa. The data are the means ± SD (n = 3). \*, p < 0.05 versus the control group; ^, p < 0.05 versus the mock group.

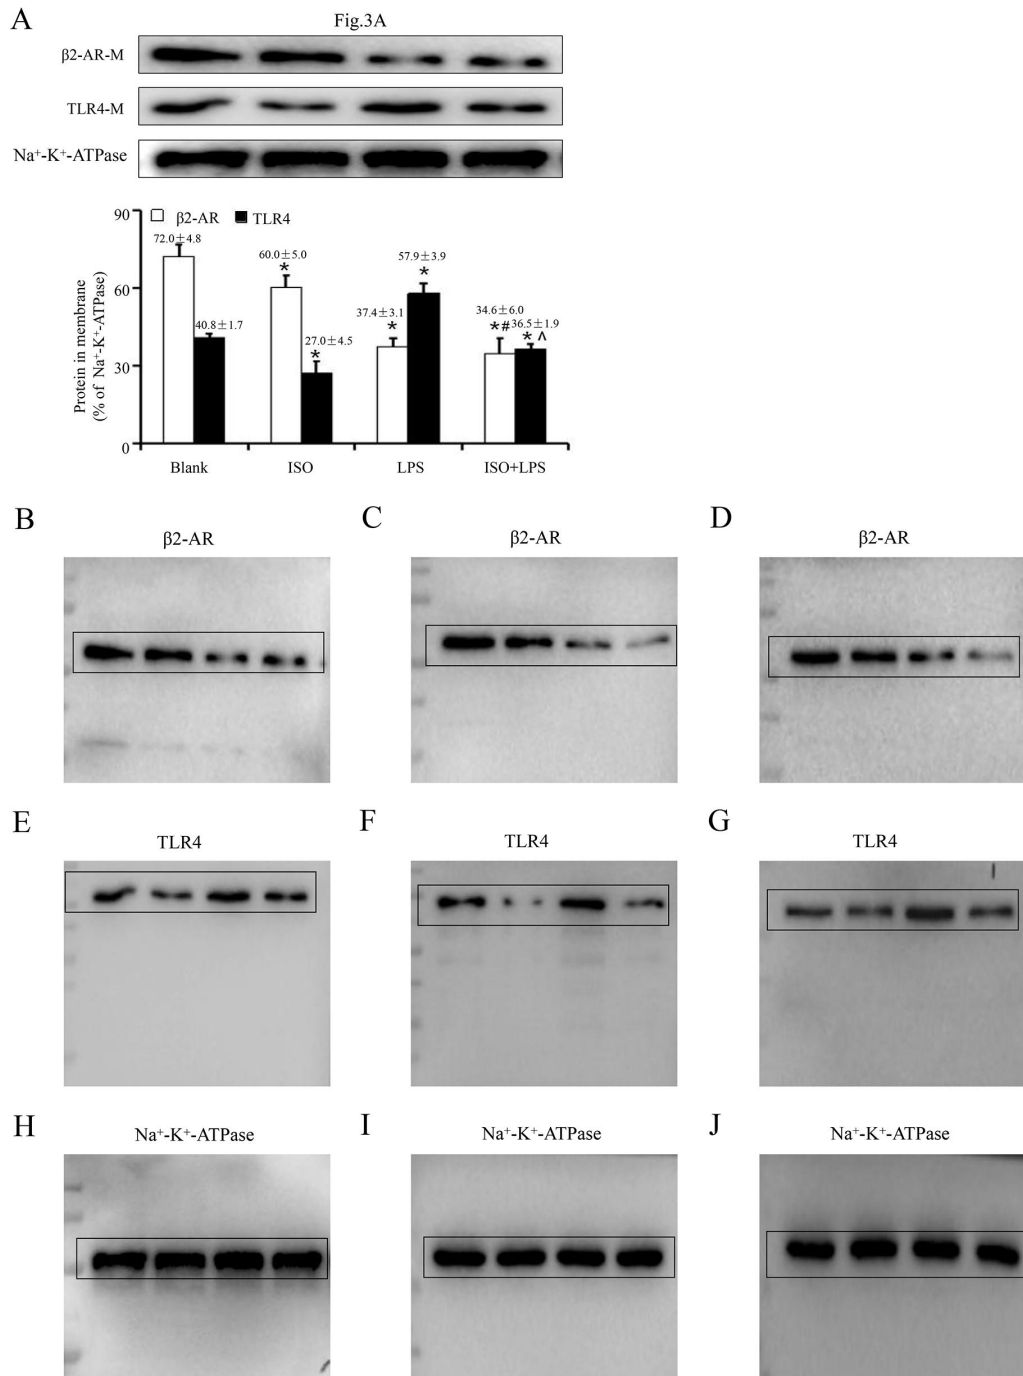

**Fig.S5.** Original full-size western blots used for Figure 3A. (A) Fig. 3A. (B-D) The full WB membranes of β<sub>2</sub>-AR. The molecular mass (MW) is 45 kDa. (E-G) The full WB membranes of TLR4. The molecular mass (MW) is 97 kDa. (H-J) The full WB membranes of Na<sup>+</sup>-K<sup>+</sup>-ATPase. The molecular mass (MW) is 117 kDa. The data are the means ± SD (n = 3). \*, p < 0.05 versus the blank group; ^, p < 0.05 versus the LPS group; #, versus the ISO group.

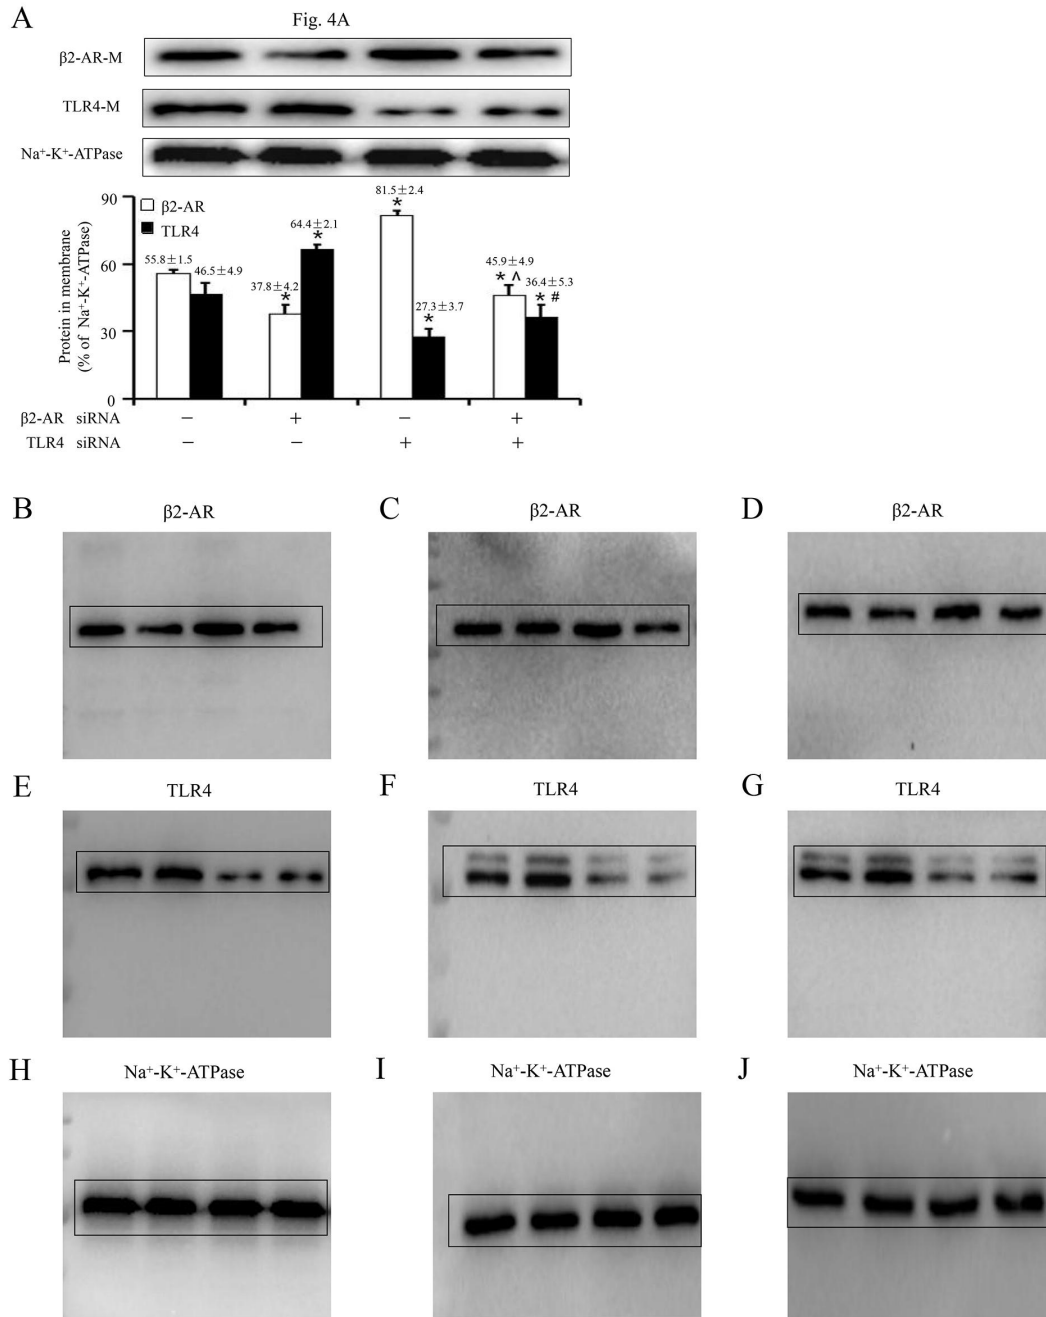

**Fig.S6.** Original full-size western blots used for Figure 4A. (A) Fig. 4A. (B-D) The full WB membranes of β<sub>2</sub>-AR. The molecular mass (MW) is 45 kDa. (E-G) The full WB membranes of TLR4. The molecular mass (MW) is 97 kDa. (H-J) The full WB membranes of Na<sup>+</sup>-K<sup>+</sup>-ATPase. The molecular mass (MW) is 117 kDa. The data are the means ± SD (n = 3). \*, p < 0.05 versus the NC; ^, p < 0.05, versus the β<sub>2</sub>-AR siRNA group, #, p < 0.05, versus the TLR4 siRNA group.
